# Supplementary material for: Fluorinated aromatic PBCTF and 6:2 diPAP in bridge and traffic paints
Source: Royal Society of Chemistry journal article supplement (doi:10.1039/d4em00546e), 2024-01-01
Supplement: d4em00546e1.pdf [file d4em00546e1.pdf]

## SUPPORTING INFORMATION

### Fluorinated Aromatic PCBTF and 6:2 diPAP in Bridge and Traffic Paints

Mitchell L. Kim-Fu<sup>1</sup>, Ansel R. Moll<sup>2</sup>, Esteban E. Hernandez<sup>1</sup>, Boris Droz<sup>3</sup>, Thierry N.J. Fouquet<sup>4</sup>,  
Jennifer A. Field<sup>5,\*</sup>

<sup>1</sup>Department of Chemistry, Oregon State University, Corvallis, OR 97331, USA

<sup>2</sup>School of Chemical, Biological, and Environmental Engineering, Oregon State University, Corvallis, OR 97331, USA

<sup>3</sup>Department of Biological and Ecological Engineering, Oregon State University, Corvallis, OR 97331, USA

<sup>4</sup>Bausch + Lomb Americas, Rochester, NY 14609, USA

<sup>5</sup>Department of Environmental and Molecular Toxicology, Oregon State University, Corvallis, OR 97331, USA

\*Corresponding Author

Email Address: [jennifer.field@oregonstate.edu](mailto:jennifer.field@oregonstate.edu); Phone: (541) 737-2265; Fax: (541) 737-0497

**Number of Pages:** 25

**Number of Tables:** 7

**Number of Figures:** 10

| <b>Table of Contents</b>                                                                                                          | <b>Page</b>    |
|-----------------------------------------------------------------------------------------------------------------------------------|----------------|
| Materials and Methods                                                                                                             | <b>S3-S8</b>   |
| <b>Table S1:</b> List of target volatile PFAS standards                                                                           | <b>S9</b>      |
| <b>Table S2:</b> List of suspect volatile PFAS standards                                                                          | <b>S10</b>     |
| <b>Table S3:</b> List of target ionic (non-volatile) PFAS standards                                                               | <b>S11-S12</b> |
| <b>Table S4:</b> Whole method precision (% RSD), whole method accuracy (% average recovery), LOD, and LOQ for <sup>19</sup> F-NMR | <b>S13</b>     |
| <b>Table S5:</b> Whole method precision (%RSD), method accuracy (% average recovery), LOD, and LOQ for volatile PFAS              | <b>S14-S15</b> |
| <b>Table S6:</b> Whole method precision (%RSD), method accuracy (% average recovery), LOD, and LOQ for non-volatile PFAS          | <b>S16</b>     |
| <b>Table S7:</b> Average volatile PFAS extracted internal standard recoveries                                                     | <b>S17</b>     |
| <b>Figure S1:</b> EI mass spectrum for PCBTF standard                                                                             | <b>S18</b>     |
| <b>Figure S2:</b> Reference fluoropolymer pyrograms                                                                               | <b>S19</b>     |
| <b>Figure S3:</b> Example of blank subtraction for py-GC-MS TICs and EGA-MS                                                       | <b>S20</b>     |
| <b>Figure S4:</b> Example of EGA-MS, pyrogram, and mass spectrum for TP-G                                                         | <b>S21</b>     |
| <b>Figure S5-S10:</b> Pyrograms of the selected subset of traffic and bridge paint solid residuals                                | <b>S22-23</b>  |
| References                                                                                                                        | <b>S24-25</b>  |

**Materials.** High performance HPLC grade water (>99%) and methanol for nonvolatile PFAS analysis (>99%) were purchased from Fisher Scientific (Hampton, NH). Methanol for volatile PFAS analysis ( $\geq 99.5\%$ ) and ammonium acetate for ionic (non-volatile) PFAS analysis ( $\geq 97\%$ ) were purchased from VWR (Radnor, PA). Deuterated methanol (99.8%) for  $^{19}\text{F}$ -NMR was purchased from Cambridge Isotope Laboratories (Tewksbury, MA). Deuterated TFE ( $\text{d}_3$ -TFE) was purchased from Sigma-Aldrich (St. Louis, MO).

**GC-MS Analysis.** For volatile PFAS and *p*-chlorotrifluorobenzene (PCBTF) analysis, 10  $\mu\text{L}$  of extract was injected in splitless mode with an inlet temperature of 280  $^\circ\text{C}$ . A 4 mm i.d. single taper Topaz inlet liner with 15 mg deactivated quartz wool (Restek, Bellefonte, PA) was used. Helium was used as the carrier gas in a constant flow mode of 1 mL/min. Separations were performed using a deactivated, fused silica tubing capillary column (Agilent, 5 m  $\times$  0.53 mm i.d.) connected to an Rxi-624Sil MS capillary column (Restek, 30 m  $\times$  0.25 mm i.d., 1.40  $\mu\text{m}$  film thickness). The GC oven temperature program was as follows: 50  $^\circ\text{C}$  for 2 min, ramped to 188  $^\circ\text{C}$  at a rate of 5  $^\circ\text{C}/\text{min}$ , then ramped to 300  $^\circ\text{C}$  at a rate of 15  $^\circ\text{C}/\text{min}$  for a total run time of 37.07 min. The Agilent 6890 GC was connected to an Agilent 5973N MS (Santa Clara, CA) that was operated in positive chemical ionization mode and in selected ion monitoring mode with methane as the reagent gas at a flow rate of 1 mL/min. Analyte concentrations for fluorotelomer alcohols (FTOHs), secondary fluorotelomer alcohols (sFTOHs), perfluoroalkyl sulfonamides (FOSAs), and perfluorooctane sulfonamidoethanols (FOSEs) were determined by a calibration curve with a minimum of 6 points with 1/x weighted linear regression or quadratic regression. All standards were prepared in the range of 1–2000 pg/ $\mu\text{L}$ . For PCBTF, due to the lack of a matching internal standard and large response, an external calibration curve of 6 points using linear regression was used for quantification. The PCBTF calibration curve was prepared in the range of 1–500 pg/ $\mu\text{L}$ . Continuing calibration verification standards (10 and 100 pg/ $\mu\text{L}$ ) were analyzed after every five paint samples and concentrations were expected to fall within  $\pm 30\%$ . Method blanks and solvent blanks were analyzed to monitor potential carryover introduced during the experimental procedure; however, none was observed.<sup>1</sup> Method accuracy and precision for volatile PFAS were determined by spiking three replicates of a blank paint (20 mg in 1500  $\mu\text{L}$  methanol) to give a final concentration vial of 100 pg/ $\mu\text{L}$  of target FTOHs, sFTOHs, FOSAs, and FOSEs. For PCBTF, method accuracy and precision was determined by spiking three replicates of a blank paint (20 mg

in 1500  $\mu\text{L}$  methanol) to give a final vial concentration of 50  $\text{pg}/\mu\text{L}$ . Whole-method LODs and LOQs were determined using the method of Vial and Jardy.<sup>2</sup> Eight blank (TP-L) paint samples were spiked with target FTOHs, sFTOHs, FOSAs, FOSEs, and PCBTF to give concentrations ranging from 0.17 – 420  $\text{pg}/\mu\text{L}$ . Samples were then treated by the same procedure for liquid paint by GC-MS analysis. The LOD was calculated based on weighted linear regression and method LOQ was calculated by multiplying LOD by 3.3.<sup>2</sup>

**LC-QTOF Analysis.** Chromatographic separations were achieved using an Agilent 1260 HPLC (Santa Clara, CA). Aliquots of 100  $\mu\text{L}$  of sample were injected onto a Zorbax Eclipse XDB-C8 (Agilent, 4.6  $\times$  20 mm, 3.5  $\mu\text{m}$ ) guard column fitted with a Zorbax Eclipse Plus C18 analytical column (Agilent, 4.6  $\times$  75 mm, 3.5  $\mu\text{m}$ ) as modified after Backe et al (2013).<sup>3</sup> The aqueous mobile phase (A) was 20 mM ammonium acetate (Fisher Scientific, Hampton, NH) in 3% v/v HPLC-grade methanol in HPLC-grade water and the organic mobile phase (B) was HPLC-grade methanol. An AB SCIEX X500R QTOF-MS/MS system (Framingham, MA) was operated in negative mode (ESI-) and positive mode (ESI+) in electrospray ionization. Data were collected under SWATH<sup>®</sup> data-S5 independent acquisition for both TOF-MS and MS/MS modes. Both PFBA and MPFBA were analyzed in MS/MS mode to reduce background interferences. Over the entirety of the data acquisition period, precursor ion data (TOF-MS) were collected over an  $m/z$  range of 100 Daltons (Da; TOF start mass) to 1250 Da (TOF stop). The accumulation time was 200 ms and the ion spray voltage was -4500 V. The source and gas parameters were: 550  $^{\circ}\text{C}$  source temperature, 60 psi ion source gasses, 35 psi curtain gas, and 10 psi collision gas. The declustering potential was -20 V with 0 V spread and the collision energy was -5 V with 0 V spread. Fragments obtain by collision-induced dissociated (CID) data were collected over an  $m/z$  range from 50 Da (TOF start mass) to 1200 Da (TOF stop). The accumulation time for each SWATH window was 50 ms. Identification and quantification of target PFAS was described in Schwichtenberg et al. <sup>4</sup> Calibration curves were weighted  $1/x$  or  $1/x^2$  and made with a minimum of 5 points over the range. In negative mode the calibration range was 200-50,000  $\text{ng}/\text{L}$ . The mass labeled internal standards used for quantification of each target ionic PFAS are listed in **Table S2**. For negative mode analyses, values for a third-party reference standard (Absolute Standards, Hamden, CT) containing carboxylates (C6-14), sulfonates (C4, 6, 8), MeFOSAA, and EtFOSAA were required to fall within  $\pm 30\%$  of the expected values. In positive mode, the calibration curves ranged from 200-50,000

ng/L for the five positive mode standards (PFSxSaAm, 6:2 FTSAB, N-Tamp-FHxSA, 5:3 FTB, and 5:1:2 FTB) and the d3-prometon internal standard (**Table S2**). For both negative and positive mode, continuing calibration verification standards consisting of 500 ng/L and 2,000 ng/L were analyzed every five samples and required to fall within  $\pm 30\%$  of the expected value. Whole-method LODs and LOQs were determined using the method of Vial and Jardy.<sup>2</sup> Seven blank (TP-L) paint samples were spiked with target ionic PFAS to give final vial concentrations ranging from 8.3-833 ng/L. Samples were then treated by the same procedure for liquid paint by LC-QTOF analysis. The LOD was calculated based on weighted-linear regression and method LOQ was calculated by multiplying LOD by 3.3.<sup>2</sup> The QTOF resolution in negative mode at m/z 520 is 28000 with a maximum retention time deviation and mass error of 0.08 min and 4.9 ppm, respectively. For positive mode, the resolution at m/z 610 is 33000 with a maximum retention time deviation and mass error of 0.04 min and 0.9 ppm, respectively.

**Suspect Screening.** PatRoom (v2.3.1)<sup>5</sup> non-target analysis (NTA) workflows for environmental analysis was used under R (4.3.2)<sup>6</sup> environment. First, high-resolution mass spectrometry data files were converted into mzXML format using Proteowizard MSconvert (v3.0).<sup>7</sup> Peak picking and alignment were made using XCMS<sup>8</sup> with optimized parameters to perform best-feature finding using the Isotopologue Parameter Optimization (IPO) algorithm.<sup>9</sup> Only features appearing in all triplicates, with at least 1000 area counts and having area counts at least three-time higher compared to the method blanks were considered for further analysis. A couple of tools were taking in account and combined through PatRoom to increase the confidence level on annotated compounds using MS2 data. First, MS2 peak list were annotated for formula using Genform.<sup>10</sup> Then, in silico fragmentation and matched against mass to charge values was performed using MetFrag CL (v2.5.0)<sup>11</sup> using a dedicate database for PFAS.<sup>12</sup> Final annotation using NIST MS2 PFAS library (v1.1) was made.<sup>13</sup> Suspects were screened using the NIST (v1.8)<sup>14</sup> suspect list. Then, negative and positive list were created by selecting the compounds containing a proton donors or acceptor only, respectively using the RDKit tools.<sup>15</sup> Identification confidence follow established criteria.<sup>16</sup>

**<sup>19</sup>F-NMR Analysis.** The NMR experiments were conducted using a Bruker 800 MHz Avance IIIHD NMR spectrometer equipped with a 5 mm TCI cryoprobe tuned to <sup>19</sup>F. Data were collected with a calibrated 90-degree pulse of 11 μs, a spectral window of 237.2 ppm, 65536 complex points, and a 15 s recycle delay. Experiments were collected in automation using a refrigerated SampleCase and IconNMR software (Bruker, Billerica, MA). Spectra were referenced to CFCl<sub>3</sub> by adjusting the d<sub>3</sub>-trifluoroethanol (TFE) resonance to 76.76 ppm. To determine the limits of detection (LOD) and quantification (LOQ) seven TFE standards in d<sub>4</sub>-methanol ranging in concentration from 410 μg/L to 2400 μg/L were treated by weighted linear regression and method LOQ was calculated by multiplying LOD by 3.3.<sup>2</sup>

**Determination of Total Fluorine using NMR.** Total area units associated with fluorine were calculated according to **Equation S1**:

$$Area_{Fluorine} = (Area_{total} - Area_{TFE\ IS} - (Area_{noise} \times 4)) \quad \text{Eqn S1}$$

Total fluorine concentrations were calculated according to **Equation S2**:

$$\Sigma[F] = Area_{Fluorine} \times \frac{[TFE\ IS] \times n_F}{Area_{TFE\ IS}} \times DF \quad \text{Eqn S2}$$

where:

*Area<sub>Fluorine</sub>*: Total Integrated Area of -CF<sub>2</sub> and -CF<sub>3</sub> Groups (-70 to -200 ppm)

*Area<sub>total</sub>*: Total Integrated Area of <sup>19</sup>F Spectrum (0 to -200 ppm)

*Area<sub>TFE</sub>*: Total Integrated Area of Internal Standard TFE (-76.73 to -76.82 ppm)

*Area<sub>Fluoride</sub>*: Total Integrate Area of Fluoride (-121.67 to -121.85 ppm)

*Area<sub>noise</sub>*: A Portion of the Total Integrated Area due to Instrument Noise (0 to -50 ppm)

$\Sigma[F]$ : Total Fluorine Concentration (mM F)

[TFE IS]: TFE Internal Standard Concentration (mM)

*n<sub>F</sub>*: Number of F atoms in TFE

*DF*: Dilution Factor

**Calculation of Potential Amount 6:2 diPAP per Marking Type.** Estimation of 6:2 diPAP contribution per mile of road was done using estimated density of paint ( $\rho_{\text{paint}}=1.2 \text{ g mL}^{-1}$ ) by the

NIH<sup>17</sup> and liters of paint per kilometer of road dependent on traffic marking type estimated by the Ohio Department of Transportation.<sup>18</sup>

$$[6:2 \text{ diPAP}] \frac{\mu\text{g } 6:2 \text{ diPAP}}{\text{g Paint}} \times \frac{10^6 \text{ g } 6:2 \text{ diPAP}}{\mu\text{g } 6:2 \text{ diPAP}} \times \rho_{\text{paint}} \frac{\text{g paint}}{\text{mL Paint}} \times \frac{1000 \text{ mL}}{1 \text{ L}} \times \frac{\text{L paint}}{\text{km Road}} \quad \text{Eqn}$$

S3

**EGA-MS and py-GC-MS Analysis.** The GC inlet (temperature: 325 °C, split ratio: 1:50) was connected to the splitter using a 1.2 m x 200 μm deactivated capillary attached to a using grade 5.0 helium as carrier gas at 1.5 mL/min in constant flow mode and heated at a constant 250 °C with the GC oven. For py-GC analyses, the pyrolyzer temperature was set at 600 °C which is high enough to decompose all the paints and reference fluorinated polymers but lower than the decomposition temperature of the inorganic fillers releasing CO<sub>2</sub> as observed for all but one paint samples in the EGA-MS analyses. The GC inlet (temperature: 325 °C, split ratio: 1:50) was connected to the splitter using a Restek DB-5 (30 m x 250 μm x 0.25 μm) column using helium as carrier gas at 1.5 mL/min in constant flow mode. The GC oven temperature program was as follows: 40 °C for 3 min followed by a single ramp at 20 °C per min to 320 °C held for 8 min. For all experiments, the splitter was connected to the mass spectrometer using a 2 m x 150 μm x 0 μm restrictor with helium as carrier gas at a constant 1.25 mL/min flow rate. The mass spectrometer was operated in EI mode (source temperature: 250 °C emission: 1.5 μA; energy: 70eV), acquiring signal from m/z 40 to m/z 950 at a rate of 5 scans/sec and a threshold of 10 counts. The system was controlled by MassHunter 10.0 (Agilent) and Maestro 1.5 (Gerstel). The data files .d generated by the instrument were converted to .mzML using msConvert and processed using Bokbunja 2.11. The data processing consisted in A) a blank subtraction using the EGA-MS or py-GC-MS TIC of the conditioned empty quartz tube prior to add the sample as blank to remove the contribution of semi-volatile hydrocarbon contaminants in EGA and of column bleed in py-GC-MS (tolerance: ±2.5 mDa, **Fig. S9**), and B) the automatic extraction of all  $-(\text{CF}_2)_n-$  series with  $n \geq 2$  (threshold: 5e3, tolerance ±5 mDa) from the blank-subtracted TICs. The blank subtraction also reduces the total number of points per data file, thus accelerating the extraction step.

## Results and Discussion

**py-GC-MS.** Methyl methacrylate is detected as the main component of all but one paint samples in their pyrograms. Additionally, TP-M and BP-2 then follow in terms of similarity with MMA, methylene heptane (or isomer) and styrene as the main compounds, although the pyrogram of BP-2 also indicates the presence of isocyanate as marker of polyurethane resin, similarly to the most distinct paint sample BP-1. In all cases, however, not a single  $\text{CF}_2$  feature was extracted from the pyrograms of the paint samples using Bokbunja while the extraction of  $(\text{CF}_2)_n$  series from the pyrograms of the reference polymers using the same processing technique returned once again more than 90% of the blank-subtracted TICs. Besides usual organic polymer bases, such as poly(methyl methacrylate) or polyurethane, or inorganic fillers such as calcium carbonate, no noticeable contribution of a fluoropolymer could thus be found in these solid paint residues. The EGA-MS profiles could be separated into two groups. The first group (samples TP-B, TP-C, TP-H, and TP-M) shows a quasi-single release of decomposition products with a maximum of  $T=390$  °C. The second group (BP-1 and BP-2) shows multiple releases of decomposition products over a broad range of temperatures with multiple maxima.

**EGA-MS.** As observed in the EGA-MS TIC, a large amount of carbon dioxide is released at high temperature from the decomposition of the inorganic filler of BP-1. It leads to an excessively broad peak in the early elution times of the pyrogram, suppressing potential fluorinated species expected to elute within the same time range. The temperature of pyrolysis for paint and reference fluorinated samples has thus been reduced to 600°C, higher than the highest decomposition temperature of all the samples as found from their EGA-MS TICs, but lower than the decomposition temperature of the inorganic fillers (**Figure S10**).



**Table S1.** List of target volatile PFAS analytes. All standards were purchased from Wellington Laboratories (Guelph, ON, Canada) except for PCBTF which was purchased from ThermoScientific (Waltham, MA, USA).

| Analyte                                     | Acronym   | Neutral Molecular Formula                                        | Quantifier Ion ( <i>m/z</i> ) | Qualifier Ion ( <i>m/z</i> ) | Extracted Internal Standard |
|---------------------------------------------|-----------|------------------------------------------------------------------|-------------------------------|------------------------------|-----------------------------|
| 4:2 fluorotelomer alcohol                   | 4:2 FTOH  | C <sub>6</sub> H <sub>5</sub> OF <sub>9</sub>                    | 265                           | 227                          | MF BET                      |
| 5:2 secondary fluorotelomer alcohol         | 5:2 sFTOH | C <sub>7</sub> H <sub>5</sub> OF <sub>11</sub>                   | 277                           | 315                          | MF BET                      |
| 6:2 fluorotelomer alcohol                   | 6:2 FTOH  | C <sub>8</sub> H <sub>5</sub> OF <sub>13</sub>                   | 365                           | 327                          | MF HET                      |
| 7:2 secondary fluorotelomer alcohol         | 7:2 sFTOH | C <sub>9</sub> H <sub>5</sub> OF <sub>15</sub>                   | 377                           | 415                          | MF HET                      |
| 8:2 fluorotelomer alcohol                   | 8:2 FTOH  | C <sub>10</sub> H <sub>5</sub> OF <sub>17</sub>                  | 465                           | 427                          | M2FOET                      |
| 10:2 fluorotelomer alcohol                  | 10:2 FTOH | C <sub>12</sub> H <sub>5</sub> OF <sub>21</sub>                  | 565                           | 527                          | MF DET                      |
| 12:2 fluorotelomer alcohol                  | 12:2 FTOH | C <sub>14</sub> H <sub>5</sub> OF <sub>25</sub>                  | 665                           | 627                          | MF DET                      |
| N-methyl perfluoroalkane sulfonamide        | MeFOSA    | C <sub>9</sub> H <sub>4</sub> NO <sub>2</sub> SF <sub>17</sub>   | 514                           | -                            | d <sub>3</sub> -N-MeFOSA-M  |
| N-ethyl perfluoro-1-octane sulfonamide      | EtFOSA    | C <sub>10</sub> H <sub>6</sub> NO <sub>2</sub> SF <sub>17</sub>  | 528                           | -                            | d <sub>5</sub> -N-EtFOSA-M  |
| N-methyl perfluorooctane sulfonamidoethanol | MeFOSE    | C <sub>11</sub> H <sub>8</sub> NO <sub>3</sub> SF <sub>17</sub>  | 540                           | 558                          | d <sub>7</sub> -N-MeFOSE-M  |
| N-ethyl perfluorooctane sulfonamidoethanol  | EtFOSE    | C <sub>12</sub> H <sub>10</sub> NO <sub>3</sub> SF <sub>17</sub> | 554                           | 572                          | d <sub>9</sub> -N-EtFOSE-M  |
| <i>p</i> -chlorotrifluorobenzene            | PCBTF     | C <sub>7</sub> H <sub>4</sub> ClF <sub>3</sub>                   | 181                           | -                            | -                           |

**Table S2.** List of suspect volatile PFAS analytes.

| Analyte                                      | Acronym      | Neutral Molecular Formula                                        | Quantifier Ion ( <i>m/z</i> ) | Qualifier Ion ( <i>m/z</i> ) | Extracted Internal Standard |
|----------------------------------------------|--------------|------------------------------------------------------------------|-------------------------------|------------------------------|-----------------------------|
| 14:2 fluorotelomer alcohol                   | 14:2<br>FTOH | C <sub>16</sub> H <sub>5</sub> OF <sub>29</sub>                  | 765                           | 727                          | MFDET                       |
| N-methyl perfluoropropane sulfonamidoethanol | MeFPrSE      | C <sub>6</sub> H <sub>8</sub> NO <sub>3</sub> SF <sub>7</sub>    | 290                           | 308                          | d <sub>7</sub> -N-MeFOSE-M  |
| N-methyl perfluorobutane sulfonamidoethanol  | MeFBSE       | C <sub>7</sub> H <sub>8</sub> NO <sub>3</sub> SF <sub>9</sub>    | 340                           | 358                          | d <sub>7</sub> -N-MeFOSE-M  |
| N-methyl perfluoropentane sulfonamidoethanol | MeFPeSE      | C <sub>8</sub> H <sub>8</sub> NO <sub>3</sub> SF <sub>11</sub>   | 390                           | 408                          | d <sub>7</sub> -N-MeFOSE-M  |
| N-methyl perfluorohexane sulfonamidoethanol  | MeFHxSE      | C <sub>9</sub> H <sub>8</sub> NO <sub>3</sub> SF <sub>13</sub>   | 440                           | 458                          | d <sub>7</sub> -N-MeFOSE-M  |
| N-methyl perfluoroheptane sulfonamidoethanol | MeFHpSE      | C <sub>10</sub> H <sub>8</sub> NO <sub>3</sub> SF <sub>15</sub>  | 490                           | 508                          | d <sub>7</sub> -N-MeFOSE-M  |
| N-ethyl perfluoroethane sulfonamidoethanol   | EtFEtSE      | C <sub>6</sub> H <sub>10</sub> NO <sub>3</sub> SF <sub>5</sub>   | 254                           | 272                          | d <sub>9</sub> -N-EtFOSE-M  |
| N-ethyl perfluoropropane sulfonamidoethanol  | EtFPrSE      | C <sub>7</sub> H <sub>10</sub> NO <sub>3</sub> SF <sub>7</sub>   | 304                           | 322                          | d <sub>9</sub> -N-EtFOSE-M  |
| N-ethyl perfluorobutane sulfonamidoethanol   | EtFBSE       | C <sub>8</sub> H <sub>10</sub> NO <sub>3</sub> SF <sub>9</sub>   | 354                           | 372                          | d <sub>9</sub> -N-EtFOSE-M  |
| N-ethyl perfluoropentane sulfonamidoethanol  | EtFPeSE      | C <sub>9</sub> H <sub>10</sub> NO <sub>3</sub> SF <sub>11</sub>  | 404                           | 422                          | d <sub>9</sub> -N-EtFOSE-M  |
| N-ethyl perfluorohexane sulfonamidoethanol   | EtFHxSE      | C <sub>10</sub> H <sub>10</sub> NO <sub>3</sub> SF <sub>13</sub> | 454                           | 472                          | d <sub>9</sub> -N-EtFOSE-M  |
| N-ethyl perfluoroheptane sulfonamidoethanol  | EtFHpSE      | C <sub>11</sub> H <sub>10</sub> NO <sub>3</sub> SF <sub>15</sub> | 504                           | 522                          | d <sub>9</sub> -N-EtFOSE-M  |

**Table S3.** List of target ionic (nonvolatile) PFAS analytes.

| Analyte                                         | Acronym           | Neutral Molecular Formula                                       | Internal Standard         |
|-------------------------------------------------|-------------------|-----------------------------------------------------------------|---------------------------|
| Perfluoro-n-butanoic acid                       | PFBA <sup>2</sup> | C <sub>4</sub> HO <sub>2</sub> F <sub>7</sub>                   | MPFBA                     |
| Perfluoro-n-petnanoic acid                      | PFPeA             | C <sub>5</sub> HO <sub>2</sub> F <sub>9</sub>                   | M3PFPeA                   |
| Perfluoro-n-hexanoic acid                       | PFHxA             | C <sub>6</sub> HO <sub>2</sub> F <sub>11</sub>                  | M2PFHxA                   |
| Perfluoro-n-heptanoic acid                      | PFHpA             | C <sub>7</sub> HO <sub>2</sub> F <sub>13</sub>                  | M4PFHpA                   |
| Perfluoro-n-octanoic acid                       | PFOA              | C <sub>8</sub> HO <sub>2</sub> F <sub>15</sub>                  | M4PFOA                    |
| Perfluoro-n-nonanoic acid                       | PFNA              | C <sub>9</sub> HO <sub>2</sub> F <sub>17</sub>                  | M5PFNA                    |
| Perfluoro-n-decanoic acid                       | PFDA              | C <sub>10</sub> HO <sub>2</sub> F <sub>19</sub>                 | MPFDA                     |
| Perfluoro-n-undecanoic acid                     | PFUdA             | C <sub>11</sub> HO <sub>2</sub> F <sub>21</sub>                 | MPFUdA                    |
| Perfluoro-n-dodecanoic acid                     | PFDoA             | C <sub>12</sub> HO <sub>2</sub> F <sub>23</sub>                 | MPFDoA                    |
| Perfluoro-n-tridecanoic acid                    | PFTTrDA           | C <sub>13</sub> HO <sub>2</sub> F <sub>25</sub>                 | MPFDoA                    |
| Perfluoro-n-tetradecanoic acid                  | PFTeDA            | C <sub>14</sub> HO <sub>2</sub> F <sub>27</sub>                 | M2PFTeDA                  |
| Perfluoro-n-hexadecanoic acid                   | PFHxDA            | C <sub>16</sub> HO <sub>2</sub> F <sub>31</sub>                 | M2PFHxDA                  |
| Perfluoropropane sulfonate                      | PFPrS             | C <sub>3</sub> HO <sub>3</sub> SF <sub>7</sub>                  | M3PFBS                    |
| Perfluorobutane sulfonate                       | PFBS              | C <sub>4</sub> HO <sub>3</sub> SF <sub>9</sub>                  | M3PFBS                    |
| Perfluoropentane sulfonate                      | PFPeS             | C <sub>5</sub> HO <sub>3</sub> SF <sub>11</sub>                 | M3PFBS                    |
| Perfluorohexane sulfonate                       | PFHxS             | C <sub>6</sub> HO <sub>3</sub> SF <sub>13</sub>                 | MPFHxS                    |
| Perfluoroheptane sulfonate                      | PFHpS             | C <sub>7</sub> HO <sub>3</sub> SF <sub>15</sub>                 | MPFHxS                    |
| Perfluorooctane sulfonate                       | PFOS              | C <sub>8</sub> HO <sub>3</sub> SF <sub>17</sub>                 | MPFOS                     |
| Perfluorononane sulfonate                       | PFNS              | C <sub>9</sub> HO <sub>3</sub> SF <sub>19</sub>                 | MPFOS                     |
| Perfluorodecane sulfonate                       | PFDS              | C <sub>10</sub> HO <sub>3</sub> SF <sub>21</sub>                | MPFOS                     |
| Perfluorododecane sulfonate                     | PFDoS             | C <sub>12</sub> HO <sub>3</sub> SF <sub>25</sub>                | MPFOS                     |
| 8-chloro-perfluorooctane sulfonate              | Cl-PFOS           | C <sub>8</sub> HCIF <sub>16</sub> SO <sub>3</sub>               | MPFOS                     |
| Perfluoroethylcyclohexane sulfonate             | PFEtCHxS          | C <sub>8</sub> HO <sub>3</sub> SF <sub>15</sub>                 | MPFHxS                    |
| Perfluorobutane sulfonamide                     | FBSA              | C <sub>4</sub> H <sub>2</sub> O <sub>2</sub> NSF <sub>9</sub>   | M8FOSA                    |
| Perfluorohexane sulfonamide                     | FHxSA             | C <sub>6</sub> H <sub>2</sub> O <sub>2</sub> NSF <sub>13</sub>  | M8FOSA                    |
| Perfluorooctane sulfonamide                     | FOSA              | C <sub>8</sub> H <sub>2</sub> O <sub>2</sub> NSF <sub>17</sub>  | M8FOSA                    |
| N-methylperfluoro-1-octane sulfonamide          | MeFOSA            | C <sub>9</sub> H <sub>4</sub> O <sub>2</sub> NSF <sub>17</sub>  | d-N-MeFOSA-M              |
| N-ethylperfluoro-1-octane sulfonamide           | EtFOSA            | C <sub>10</sub> H <sub>6</sub> O <sub>2</sub> NSF <sub>17</sub> | d-N-EtFOSA-M              |
| Perfluorooctane sulfonamido acetic acid         | FOSAA             | C <sub>10</sub> H <sub>4</sub> O <sub>4</sub> NSF <sub>17</sub> | d <sub>3</sub> -N-MeFOSAA |
| N-methylperfluorooctane sulfonamido acetic acid | MeFOSAA           | C <sub>11</sub> H <sub>6</sub> O <sub>4</sub> NSF <sub>17</sub> | d <sub>3</sub> -N-MeFOSAA |
| N-ethylperfluorooctane sulfonamido acetic acid  | EtFOSAA           | C <sub>12</sub> H <sub>8</sub> O <sub>4</sub> NSF <sub>17</sub> | d <sub>5</sub> -N-EtFOSAA |
| 4:2 fluorotelomer sulfonate                     | 4:2 FTS           | C <sub>6</sub> H <sub>5</sub> O <sub>3</sub> SF <sub>9</sub>    | M2-4:2FTS                 |
| 6:2 fluorotelomer sulfonate                     | 6:2 FTS           | C <sub>8</sub> H <sub>5</sub> O <sub>3</sub> SF <sub>13</sub>   | M2-6:2FTS                 |
| 8:2 fluorotelomer sulfonate                     | 8:2 FTS           | C <sub>10</sub> H <sub>5</sub> O <sub>3</sub> SF <sub>17</sub>  | M2-8:2FTS                 |

| Analyte | Acronym | Neutral Molecular | Internal |
|---------|---------|-------------------|----------|
|---------|---------|-------------------|----------|

|                                                                                                                     |              | Formula                                                                                       | Standard                 |
|---------------------------------------------------------------------------------------------------------------------|--------------|-----------------------------------------------------------------------------------------------|--------------------------|
| 10:2 fluorotelomer sulfonate                                                                                        | 10:2 FTS     | C <sub>12</sub> H <sub>5</sub> O <sub>3</sub> SF <sub>21</sub>                                | M2-8:2FTS                |
| 6:2 fluorotelomer carboxylic acid                                                                                   | 6:2 FTCA     | C <sub>8</sub> H <sub>3</sub> O <sub>2</sub> F <sub>13</sub>                                  | M6:2FTA                  |
| 8:2 fluorotelomer carboxylic acid                                                                                   | 8:2 FTCA     | C <sub>10</sub> H <sub>3</sub> O <sub>2</sub> F <sub>17</sub>                                 | M8:2FTA                  |
| 10:2 fluorotelomer carboxylic acid                                                                                  | 10:2 FTCA    | C <sub>12</sub> H <sub>3</sub> O <sub>2</sub> F <sub>21</sub>                                 | M10:2FTA                 |
| 3:3 fluorotelomer carboxylic acid                                                                                   | 3:3 FTCA     | C <sub>6</sub> H <sub>5</sub> O <sub>2</sub> F <sub>7</sub>                                   | M6:2FTA                  |
| 5:3 fluorotelomer carboxylic acid                                                                                   | 5:3 FTCA     | C <sub>8</sub> H <sub>5</sub> O <sub>2</sub> F <sub>11</sub>                                  | M8:2FTA                  |
| 7:3 fluorotelomer carboxylic acid                                                                                   | 7:3 FTCA     | C <sub>10</sub> H <sub>5</sub> O <sub>2</sub> F <sub>15</sub>                                 | M10:2FTA                 |
| 2H-Perfluoro-2-octenoic acid (6:2)                                                                                  | 6:2 UFTCA    | C <sub>8</sub> H <sub>2</sub> O <sub>2</sub> F <sub>12</sub>                                  | M6:2FTUA                 |
| 2H-Perfluoro-2-decenoic acid (8:2)                                                                                  | 8:2 UFTCA    | C <sub>10</sub> H <sub>2</sub> O <sub>2</sub> F <sub>16</sub>                                 | M8:2FTUA                 |
| Dodecafluoro-3H-4,8-dioxanoate                                                                                      | ADONA        | C <sub>7</sub> H <sub>2</sub> O <sub>4</sub> F <sub>12</sub>                                  | M5PFNA                   |
| 9-chlorohexadecafluoro-3-oxanonane-1-sulfonate                                                                      | 9Cl-PF3ONS   | C <sub>8</sub> HF <sub>16</sub> ClSO <sub>4</sub>                                             | MPFOS                    |
| 11-chloroeicosafluoro-3-oxaundecane-1-sulfonate                                                                     | 11-PF3OUdS   | C <sub>10</sub> HF <sub>20</sub> ClSO <sub>4</sub>                                            | MPFOS                    |
| hexafluoropropylene oxide-dimer acid                                                                                | HFPO-DA      | C <sub>6</sub> HF <sub>11</sub> O <sub>3</sub>                                                | MHFPO-DA                 |
| bis(1H,1H,2H,2H-perfluorooctyl)phosphate                                                                            | 6:2 diPAP    | C <sub>16</sub> H <sub>9</sub> F <sub>26</sub> O <sub>4</sub> P                               | M4 8:2 diPAP             |
| bis(1H,1H,2H,2H-perfluorodecyl)phosphate                                                                            | 8:2 diPAP    | C <sub>20</sub> H <sub>9</sub> F <sub>34</sub> O <sub>4</sub> P                               | M4 8:2 diPAP             |
| Bis-[2-(N-ethyleperfluorooctane-1-sulfonamido)ethyl] phosphate                                                      | diSAmPAP     | C <sub>24</sub> H <sub>19</sub> F <sub>34</sub> N <sub>2</sub> O <sub>8</sub> PS <sub>2</sub> | M4 8:2 diPAP             |
| N-(3-dimethylaminopropan-1-yl)-perfluoro-1-hexanesulfonamide                                                        | PFHxSaAm     | C <sub>11</sub> H <sub>13</sub> F <sub>13</sub> N <sub>2</sub> O <sub>2</sub> S               | d <sub>3</sub> -prometon |
| 1-Propanaminium, N-(carboxymethyl)-N,N-dimethyl-3-[[[(3,3,4,4,5,5,6,6,7,7,8,8,8-tridecafluorooctyl)sulfonyl]amino]- | 6:2 FtSaB    | C <sub>15</sub> H <sub>19</sub> F <sub>13</sub> N <sub>2</sub> O <sub>4</sub> S               | d <sub>3</sub> -prometon |
| N-[3-(perfluoro-1-hexanesulfonamido)propan-1-yl]-N,N,N-trimethylammonium                                            | N-TAmP-FHxSA | C <sub>12</sub> H <sub>15</sub> F <sub>13</sub> N <sub>2</sub> O <sub>2</sub> S               | d <sub>3</sub> -prometon |
| 2-[(4,4,5,5,6,6,7,7,8,8,8-Undecafluorooctyl)dimethylammonio]acetate                                                 | 5:3 FTB      | C <sub>12</sub> H <sub>14</sub> F <sub>11</sub> NO <sub>2</sub>                               | d <sub>3</sub> -prometon |
| 2-[(3,4,4,5,5,6,6,7,7,8,8,8-Dodecafluorooctyl)dimethylammonio]acetate                                               | 5:1:2 FTB    | C <sub>12</sub> H <sub>13</sub> F <sub>12</sub> NO <sub>2</sub>                               | d <sub>3</sub> -prometon |

<sup>1</sup>[M-H]<sup>-</sup> adducts were used for quantification

<sup>2</sup>MRM transitions of 213 → 169 and 217 → 172 were used for quantification of PFBA and MPFBA, respectively, to reduce background.

**Table S4.** Whole method precision (% RSD), whole method accuracy (% average recovery), LODs, and LOQs for <sup>19</sup>F-NMR. In TP-L, a d<sub>3</sub>-TFE standard ranging in concentration from 16 µg F/g paint to 950 µg F/g paint was spiked and extracted in d<sub>4</sub>-methanol. The LOD (n = 7) was determined weighted linear regression and LOQ was calculated by multiplying LOD with 3.3.<sup>2</sup> For accuracy and precision, 1 mM of PCBTF was spiked into TP-L (n=3) and extracted in d<sub>4</sub>-methanol.

| Figure of Merit                        | Value |
|----------------------------------------|-------|
| Limit of Detection (µg F/g paint)      | 60    |
| Limit of Quantification (µg F/g paint) | 200   |
| Accuracy (%)                           | 88    |
| Precision (%RSD)                       | 2.0   |

**Table S5.** Whole method precision (% RSD), whole method accuracy (% average recovery), LODs, and LOQs based on liquid paint sample (TP-L) spiked with volatile PFAS. Paint was spiked volatile PFAS for whole method precision and whole method accuracy (n = 3) so that the final vial concentration was 50 µg/L for PCBTF and 100 µg/L for all other volatile PFAS. For LODs/LOQs, volatile PFAS were spiked for final concentrations ranging from 0.17 µg/L to 420 µg/L. The LOD (n = 8) was determined by weighted linear regression and LOQ was calculated by multiplying LOD with 3.3.<sup>2</sup>

| Analyte   | Whole method precision (% average recovery) | Whole method accuracy (% RSD) | LOD (µg/g) | LOQ (µg/g) |
|-----------|---------------------------------------------|-------------------------------|------------|------------|
| 4:2 FTOH  | 130                                         | 4.2                           | 1.9        | 5.7        |
| 5:2 sFTOH | 110                                         | 8.8                           | 1.3        | 3.9        |
| 6:2 FTOH  | 71                                          | 3.0                           | 0.42       | 1.3        |
| 7:2 sFTOH | 99                                          | 10.                           | 1.3        | 3.9        |
| 8:2 FTOH  | 71                                          | 1.4                           | 0.12       | 0.36       |
| 10:2 FTOH | 130                                         | 4.7                           | 0.34       | 1.0        |
| 12:2 FTOH | 120                                         | 6.0                           | 1.3        | 3.9        |
| MeFOSA    | 130                                         | 2.8                           | 0.22       | 0.65       |
| EtFOSA    | 130                                         | 1.6                           | 0.28       | 0.84       |
| MeFOSE    | 93                                          | 1.4                           | 1.6        | 4.7        |
| EtFOSE    | 110                                         | 3.3                           | 1.7        | 5.0        |

**Table S6.** Volatile PFAS extracted internal standards percent recovery on matrix spike and samples. The recovery of volatile extracted internal standard (EIS) was determined based on the response of each EIS standard relative to the response of 7:1 FTOH as the non-extracted internal standard (NIS). All EIS standard recoveries fall within the  $\pm 30\%$  accuracy range except for MFHET. Variation in recovery and 160% recovery for MFHET may be due to the lack of a matching NIS.

| Extracted Internal Standard | Average Percent Recovery | % RSD |
|-----------------------------|--------------------------|-------|
| MF BET                      | 78                       | 13    |
| MF HET                      | 160                      | 13    |
| M2FOET                      | 130                      | 2.2   |
| MF DET                      | 120                      | 4.9   |
| d <sub>3</sub> -N-MeFOSA-M  | 71                       | 15    |
| d <sub>5</sub> -N-EtFOSA-M  | 73                       | 14    |
| d <sub>7</sub> -N-MeFOSE-M  | 110                      | 16    |
| d <sub>9</sub> -N-EtFOSE-M  | 89                       | 15    |

**Table S7.** Whole method precision (% RSD), whole method accuracy (% average recovery), LODs, and LOQs based on liquid paint sample (TP-L) spiked with ionic (non-volatile) PFAS. Painted was spiked with non-volatile PFAS for whole method precision and whole method accuracy (n = 3) so that the final concentration was 833 ng/L. For LODs/LOQs, non-volatile PFAS were spiked for final vial concentrations ranging from 8.3 ng/L to 833 ng/L. The LOD (n = 7) was determined by weighted linear regression and LOQ was calculated by multiplying LOD with 3.3.<sup>2</sup>

| Analyte  | Whole method precision (% average recovery) | Whole method accuracy (% RSD) | LOD (µg/g) | LOQ (µg/g) |
|----------|---------------------------------------------|-------------------------------|------------|------------|
| PFBA     | 130                                         | 13                            | 0.037      | 0.11       |
| PFPeA    | 110                                         | 14                            | 0.013      | 0.039      |
| PFHxA    | 100                                         | 6.8                           | 0.0031     | 0.0094     |
| PFHpA    | 120                                         | 6.5                           | 0.0042     | 0.013      |
| PFOA     | 110                                         | 11                            | 0.0041     | 0.012      |
| PFNA     | 100                                         | 6.4                           | 0.011      | 0.033      |
| PFDA     | 99                                          | 11                            | 0.0093     | 0.028      |
| PFUdA    | 110                                         | 7.0                           | 0.0087     | 0.026      |
| PFDaA    | 98                                          | 7.8                           | 0.0094     | 0.028      |
| PFTTrDA  | 76                                          | 14                            | 0.0093     | 0.028      |
| PFTeDA   | 100                                         | 5.9                           | 0.0099     | 0.030      |
| PFHxDA   | 110                                         | 7.5                           | 0.0058     | 0.017      |
| PFPrS    | 110                                         | 16                            | 0.0071     | 0.021      |
| PFBS     | 270                                         | 20                            | 0.86       | 2.6        |
| PFPeS    | 96                                          | 14                            | 0.0026     | 0.0077     |
| PFHxS    | 100                                         | 7.3                           | 0.0068     | 0.021      |
| PFHpS    | 100                                         | 7.7                           | 0.0017     | 0.0051     |
| PFOS     | 110                                         | 6.8                           | 0.0091     | 0.027      |
| PFNS     | 98                                          | 6.1                           | 0.0024     | 0.0072     |
| PFDS     | 93                                          | 4.3                           | 0.0048     | 0.014      |
| PFDoS    | 75                                          | 8.5                           | 0.00059    | 0.0018     |
| Cl-PFOS  | 110                                         | 7.7                           | 0.0021     | 0.0064     |
| PFEtCHxS | 98                                          | 8.6                           | 0.0078     | 0.024      |
| FBSA     | 110                                         | 4.4                           | 0.0060     | 0.018      |
| FHxSA    | 110                                         | 3.1                           | 0.0029     | 0.0088     |
| FOSA     | 120                                         | 6.3                           | 0.0020     | 0.0060     |
| MeFOSA   | 100                                         | 9.9                           | 0.0012     | 0.0035     |
| EtFOSA   | 110                                         | 13.6                          | 0.0050     | 0.015      |
| FOSAA    | 73                                          | 12                            | 0.0015     | 0.0046     |
| MeFOSAA  | 110                                         | 6.7                           | 0.00041    | 0.0012     |
| EtFOSAA  | 110                                         | 7.7                           | 0.011      | 0.034      |
| 4:2 FTS  | 77                                          | 28                            | 0.013      | 0.040      |
| 6:2 FTS  | 110                                         | 7.1                           | 0.0039     | 0.012      |
| 8:2 FTS  | 130                                         | 10.                           | 0.012      | 0.035      |



| Analyte      |     |     |         |         |
|--------------|-----|-----|---------|---------|
| 10:2 FTS     | 120 | 3.3 | 0.0079  | 0.024   |
| 3:3 FTCA     | 110 | 11  | 0.029   | 0.086   |
| 5:3 FTCA     | 99  | 14  | 0.00016 | 0.00048 |
| 7:3 FTCA     | 120 | 22  | 0.0205  | 0.048   |
| 6:2 FTCA     | 96  | 18  | 0.021   | 0.061   |
| 8:2 FTCA     | 120 | 12  | 0.013   | 0.039   |
| 10:2 FTCA    | 120 | 4.2 | 0.014   | 0.042   |
| 6:2 UFTCA    | 120 | 4.0 | 0.0097  | 0.029   |
| 8:2 UFTCA    | 120 | 8.7 | 0.014   | 0.043   |
| ADONA        | 110 | 5.8 | 0.0048  | 0.014   |
| 9Cl-PF3ONS   | 100 | 7.5 | 0.0046  | 0.014   |
| 11-PF3OUdS   | 84  | 14  | 0.014   | 0.041   |
| HFPO-DA      | 87  | 9.8 | 0.019   | 0.057   |
| 6:2 diPAP    | 114 | 10. | 0.016   | 0.049   |
| 8:2 diPAP    | 120 | 7.2 | 0.0052  | 0.016   |
| diSAmPAP     | 56  | 1.0 | 0.0029  | 0.0086  |
| PFHxSaAm     | 120 | 4.3 | 0.0053  | 0.016   |
| 6:2 FtSaB    | 130 | 9.6 | 0.0131  | 0.039   |
| N-TAmP-FHxSA | 120 | 7.0 | 0.0020  | 0.0061  |
| 5:3 FTB      | 110 | 10. | 0.010   | 0.031   |
| 5:1:2 FTB    | 120 | 3.7 | 0.0039  | 0.012   |

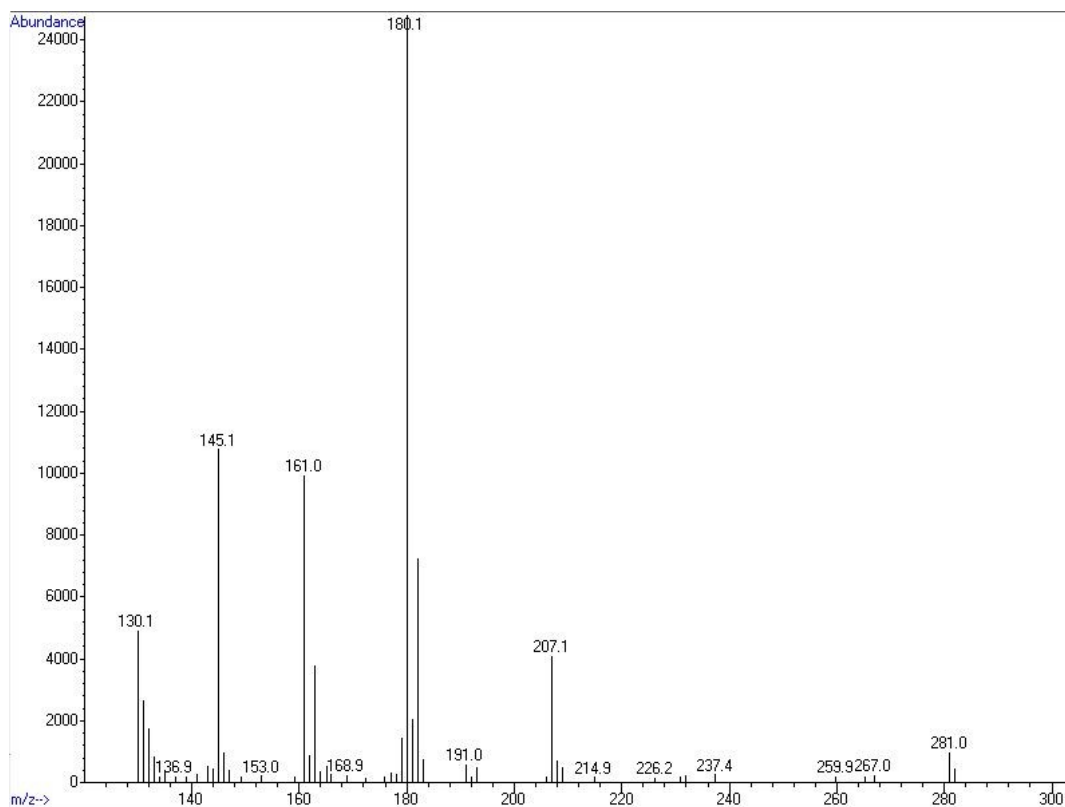

**Figure S1.** Electron ionization mass spectrum of PCBTF standard acquired in full scan acquisition mode

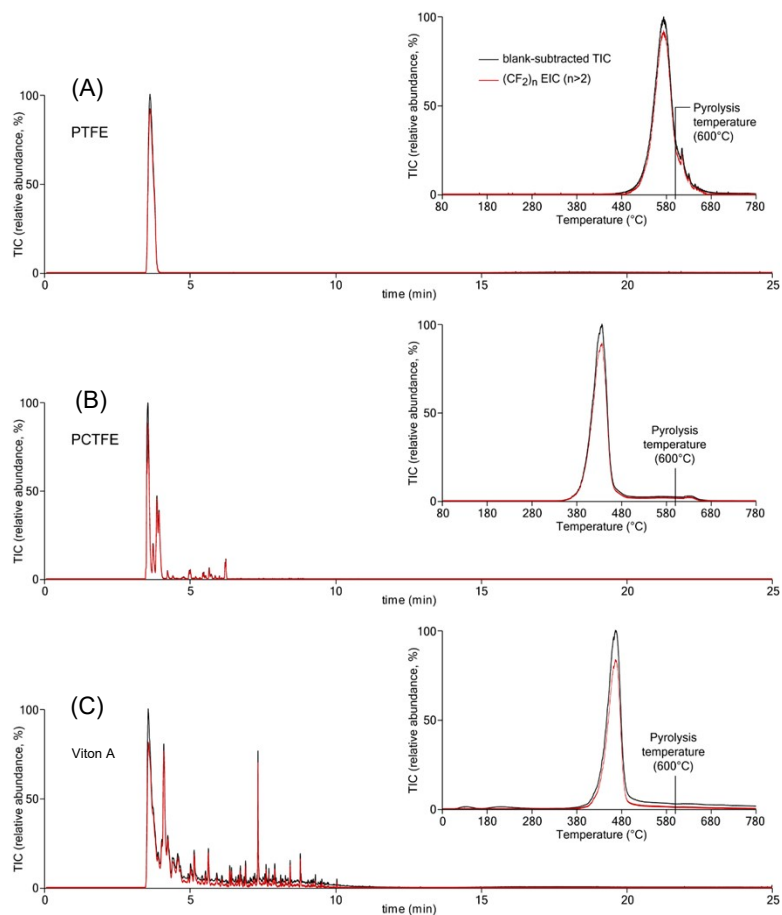

**Figure S2.** Reference fluoropolymer pyrograms for (a) polytetrafluoroethylene (ThermoFisher, Waltham, MA), (b) poly(chlorotrifluoroethylene) (St. Louis, MO), and (c) Viton A (Chemours, Wilmington, DE).

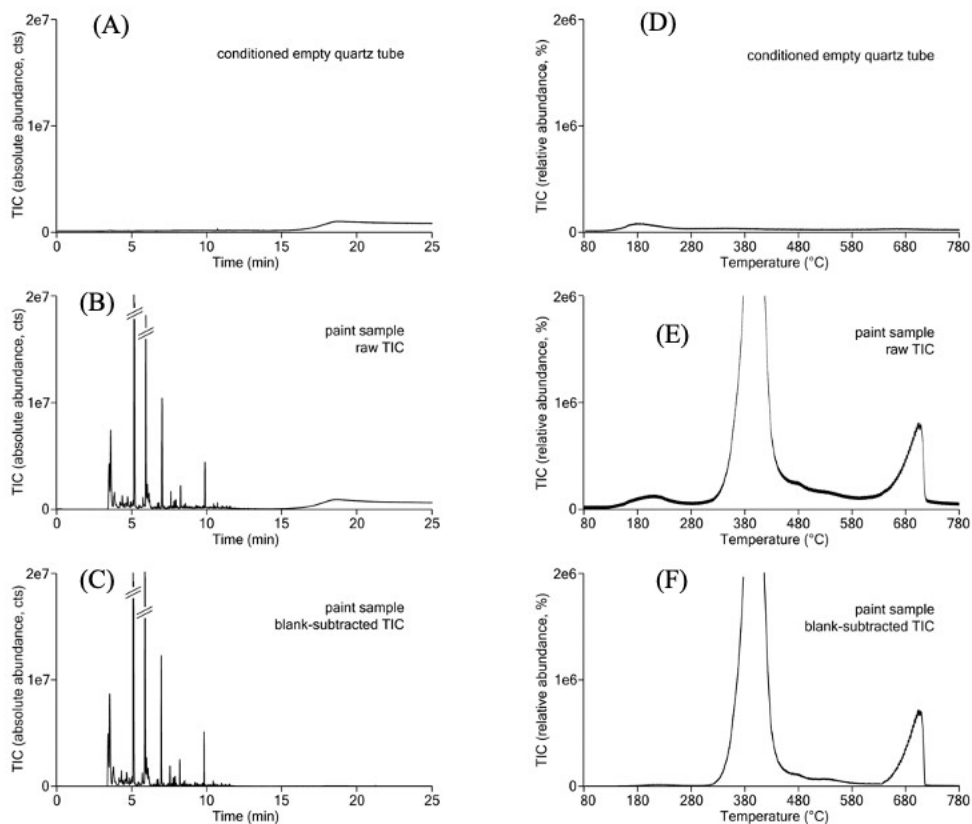

**Figure S3.** Example of blank subtraction for py-GC-MS TICs (left, (A)-(C)) and EGA-MS (right, (D)-(F)) to reduce the contribution of the column bleed and semi-volatile hydrocarbon contaminants, respectively, while reducing the total number of points to speed up the subsequent extraction of  $(CF_2)_n$  series.

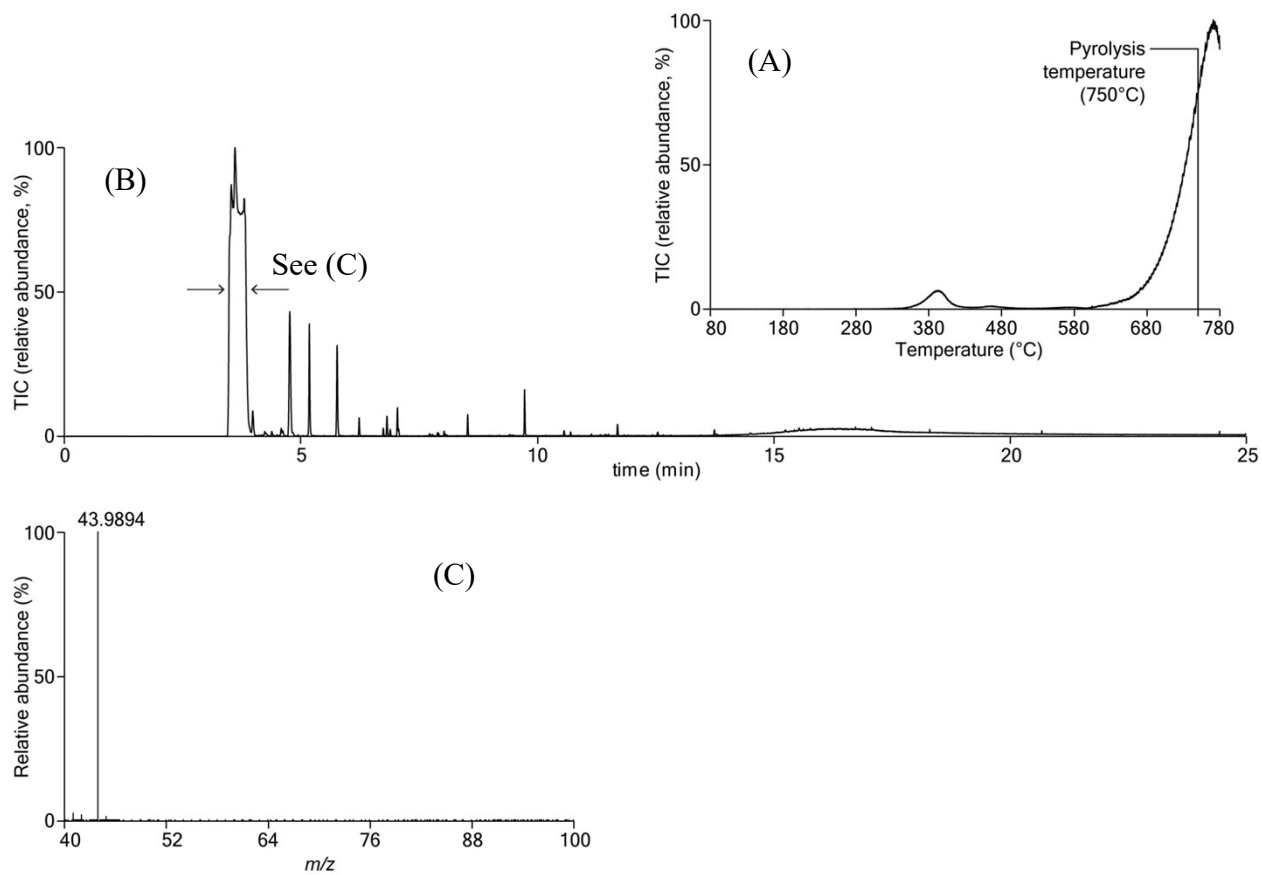

**Figure S4.** (A) EGA-MS of the paint sample BP-1 and (B) pyrogram from the pyrolysis of BP-1 at 750°C. (C) Average mass spectrum from the first 1.5 min of the pyrogram.

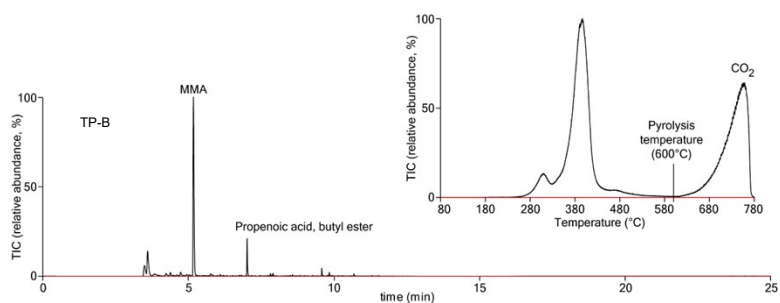

**Figure S5.** Pyrogram of solid residual from road paint TP-B

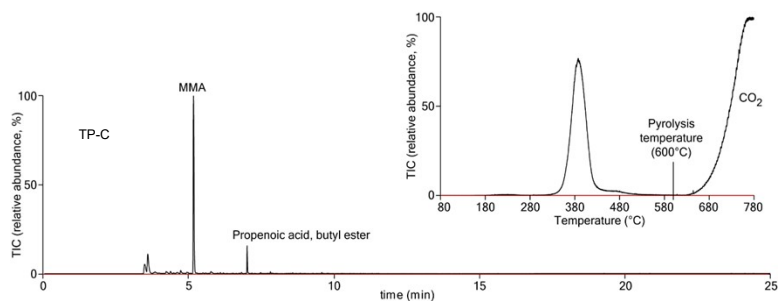

**Figure S6.** Pyrogram of solid residual from traffic paint TP-C

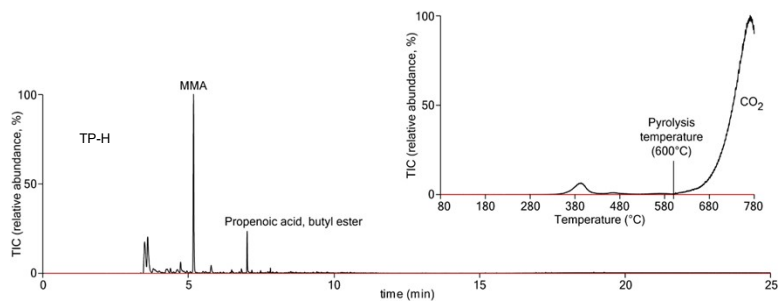

**Figure S7.** Pyrogram of solid residual from traffic paint TP-H

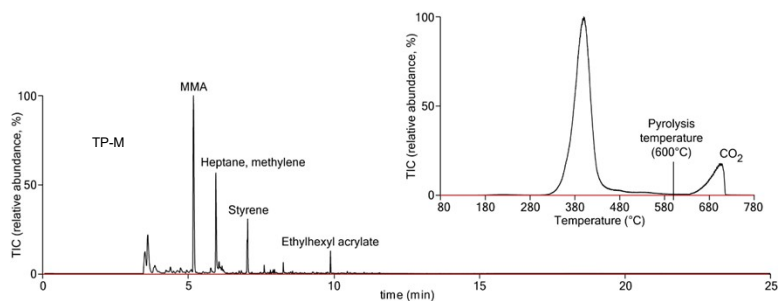

**Figure S8.** Pyrogram of solid residual from traffic paint TP-M

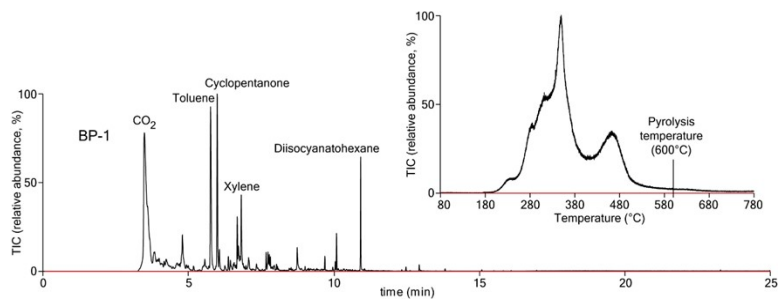

**Figure S9.** Pyrogram of solid residual from bridge paint BP-1

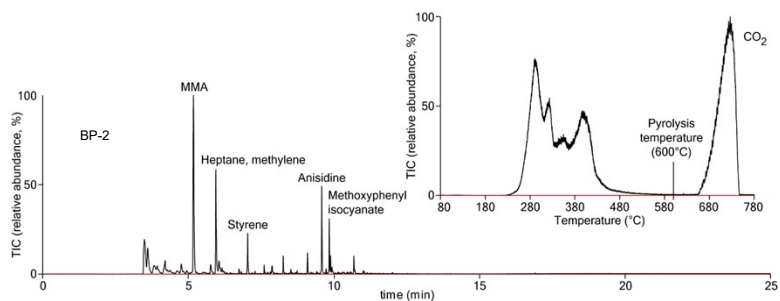

**Figure S10.** Pyrogram of solid residual from traffic paint BP-2

## References

- (1) L. Cahuas, I. A. Titaley, J. A. Field, Mass-labeled fluorotelomer alcohol fragmentation gives “false positive” for nonlabeled fluorotelomer alcohols with implications for consumer product analysis, *J. Am. Soc. Mass Spectrom.* 2022, **33**, 399–403.
- (2) J. Vial, A. Jardy, Experimental comparison of the different approaches to estimate LOD and LOQ of an HPLC method, *Anal. Chem.* 1999, **71**, 2672–2677.
- (3) W. J. Backe, C. T. Day, J. A. Field, Zwitterionic, cationic, and anionic fluorinated chemicals in aqueous film forming foam formulations and groundwater from U.S. military bases by nonaqueous large-volume injection HPLC-MS/MS, *Environ. Sci. Technol.* 2013, **47**, 5226–5234.
- (4) T. Schwichtenberg, D. Bogdan, C. C. Carignan, P. Reardon, J. Rewerts, T. Wanzek, J. A. Field, PFAS and dissolved organic carbon enrichment in surface water foams on a Northern U.S. freshwater lake, *Environ. Sci. Technol.* 2020, **54**, 14455–14464.
- (5) R. Helmus, B. van de Velde, A. M. Brunner, T. L. ter Laak, A. P. van Wezel, E. L. Schymanski, patRoon 2.0: Improved non-target analysis workflows including automated transformation product screening, *Journal of Open Source Software.* 2022, **7**, 4029.
- (6) R: A language and environment for statistical computing, <http://www.R-project.org>, (accessed 05 May 2024).
- (7) D. Kessner, M. Chambers, R. Burke, D. Agus, P. Mallick, ProteoWizard: open source software for rapid proteomics tools development, *Bioinformatics* 2008, **24**, 2534–2536.
- (8) C. A. Smith, E. J. Want, G. O'Maille, R. Abagyan, G. Siuzdak, XCMS: processing mass spectrometry data for metabolite profiling using nonlinear peak alignment, matching, and identification, *Anal. Chem.* 2006, **78**, 779–787.
- (9) G. Libiseller, M. Dvorzak, U. Kleb, E. Gander, T. Eisenberg, F. Madeo, S. Neumann, G. Trausinger, F. Sinner, T. Pieber, C. Magnes, PO: a tool for automated optimization of XCMS parameters, *BMC Bioinformatics.* 2015, **16**, 118.
- (10) M. Meringer, S. Reinker, J. Zhang, A. Muller, MS/MS data improves automated determination of molecular formulas by mass spectrometry. *MATCH Communications in Mathematical and in Computer Chemistry.* 2011, **65**, 259–290.
- (11) C. Ruttkies, S. Neumann, S. Posch, Improving MetFrag with statistical learning of fragment annotations, *BMC Bioinformatics.* 2019, **20**, 376.



- (12) PubChem OECD PFAS Larger PFAS Parts file for MetFrag (ver. hid120\_HNID5525061\_20230319) <https://doi.org/10.5281/zenodo.7750267>, (accessed May 2024).
- (13) Database Infrastructure for Mass Spectrometry - Per- and Polyfluoroalkyl Substances - v1.1.0 <https://doi.org/10.18434/mds2-2905>, (accessed 05 May 2024).
- (14) Suspect List of Possible Per- and Polyfluoroalkyl Substances (PFAS). <https://data.nist.gov/od/id/mds2-2387>, (accessed 05 May 2024).
- (15) rdkit/rdkit: Release\_2023.09.5., <https://zenodo.org/records/10633624>, (accessed 05 May 2024).
- (16) J. A. Charbonnet, C. A. McDonough, F. Xiao, T. Schwichtenberg, D. Cao, S. Kaserzon, K. V. Thomas, P. Dewapriya, B. J. Place, E. L. Schymanski, J. A. Field, D. E. Helbling, C. P. Higgins, Communicating confidence of per- and polyfluoroalkyl substance identification via high-resolution mass spectrometry, *Environ. Sci. Technol. Lett.* 2022, **9**, 473–481.
- (17) H. J. Bremmer, J. G. M. van Engelen. Brush and Roller Painting. In *Paint Products Fact Sheet: To assess the risks for the consumer: Updated version for ConsExpo 4*; National Institute for Public Health and the Environment, 2006.
- (18) ITEM 642 TRAFFIC PAINT. <https://www.dot.state.oh.us/Divisions/ConstructionMgt/OnlineDocs/Specifications/2008C MS/600/642.htm>, (accessed 20 December 2023).
